# Supplementary material for: The Roles and Regulatory Mechanisms of Tight Junction Protein Cingulin and Transcription Factor Forkhead Box Protein O1 in Human Lung Adenocarcinoma A549 Cells and Normal Lung Epithelial Cells
Source: MDPI journal article supplement (doi:10.3390/ijms25031411), 2024-01-24
Supplement: s1 [file s1]

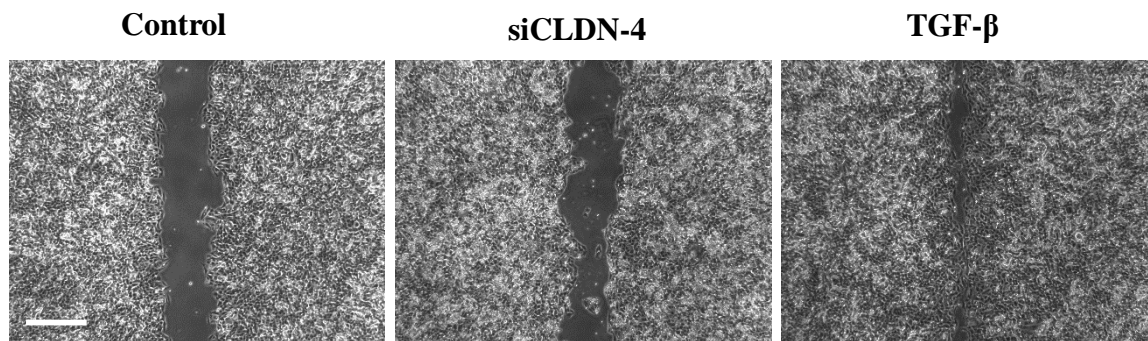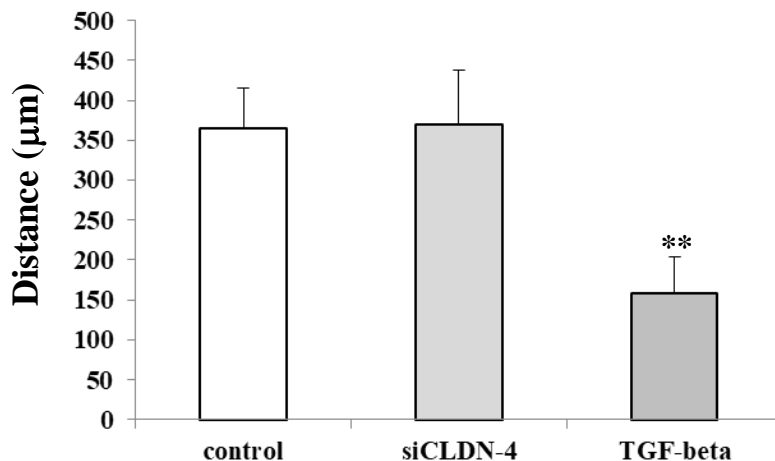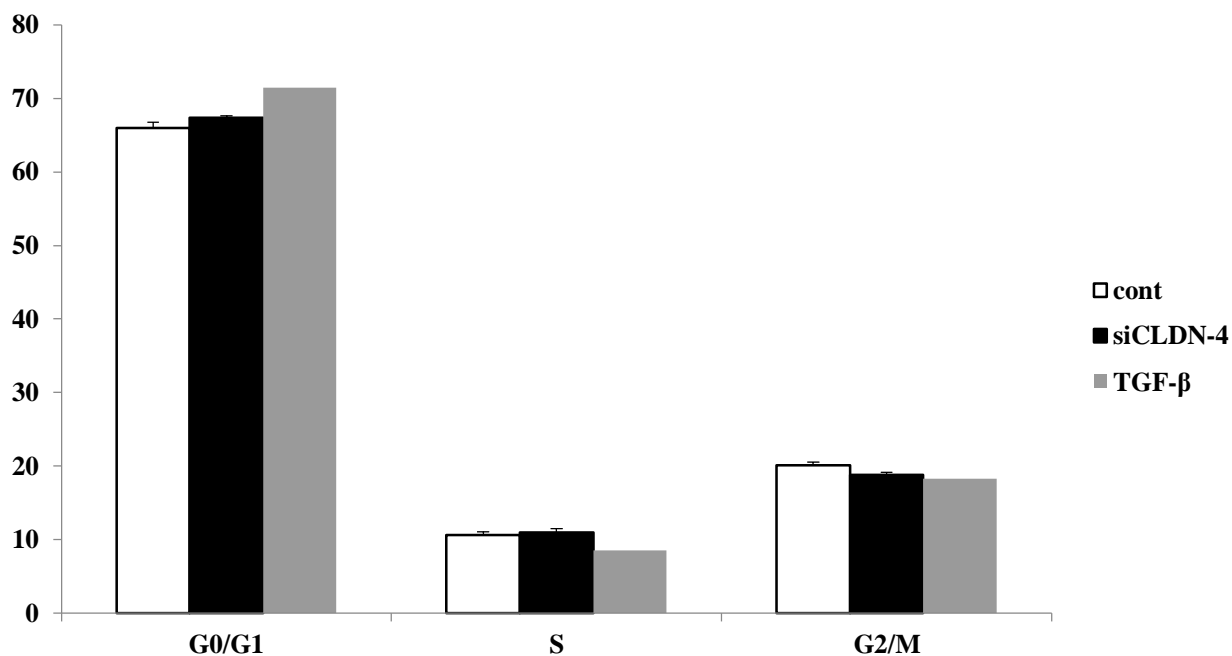

**Supplemental Figure S1:** Images of scratch wound assay in A549 cells performed knockdown of CLDN-4 and treated with TGF- $\beta$ . The distance is shown as a bar graph. Scale bars: 200  $\mu$ m. \*\* $p < 0.01$ , vs. control. Cell cycle assay of A549 cells performed knockdown of CLDN-4 and treated with TGF- $\beta$ . The results are shown as bar graphs. \*\* $p < 0.01$ , vs. control.

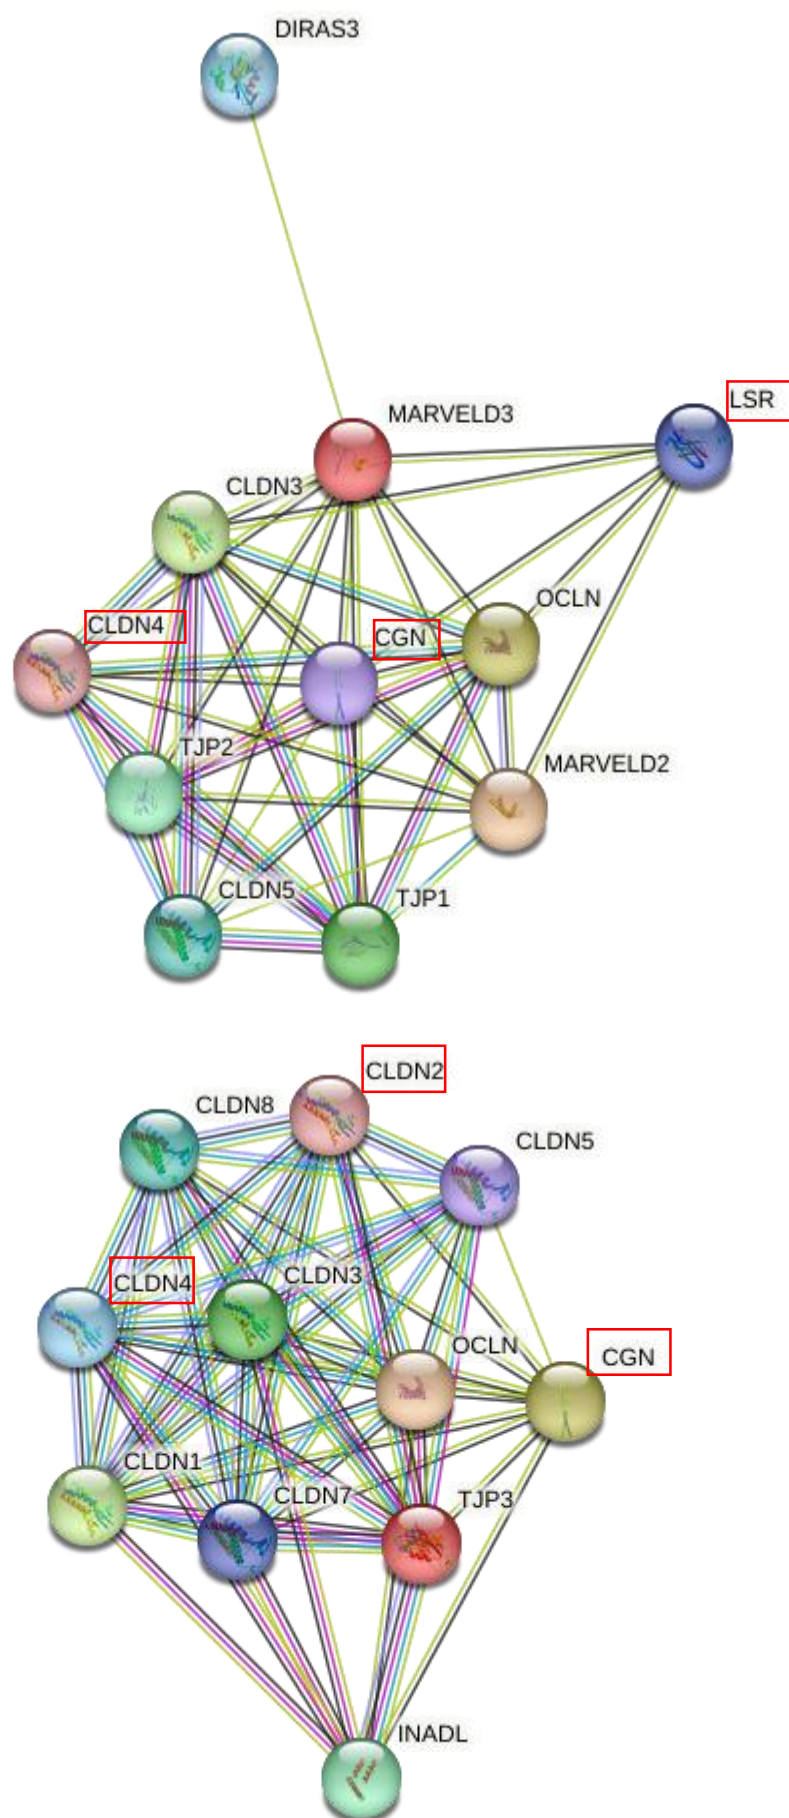

**Supplemental Figure S2:** Protein-protein interaction map. CGN directly interacts with CLDN-2, CLDN-4 and LSR.

## Lung adenocarcinoma

**CGN (223233\_s\_at)**

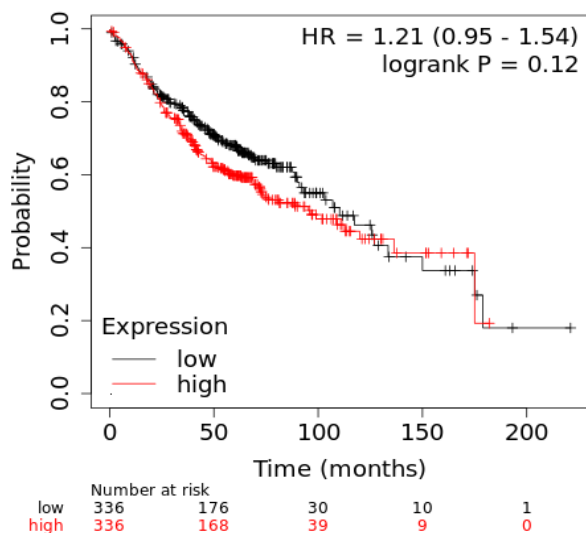

**FOXO1 (202724\_s\_at)**

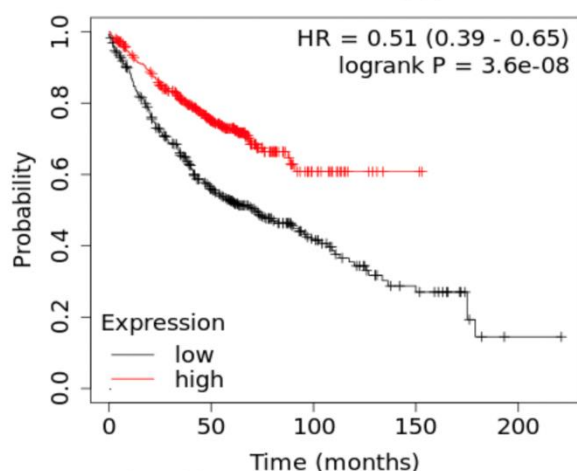

**hCPE-R (201428\_at) (CLDN-4)**

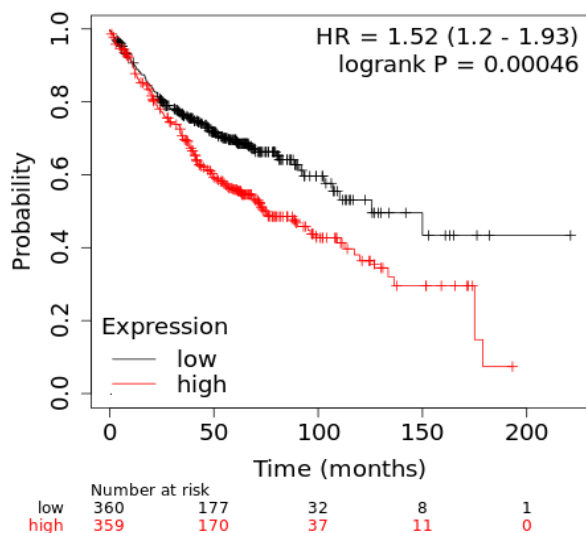

## Lung cancer (all)

**CGN (223232\_s\_at)**

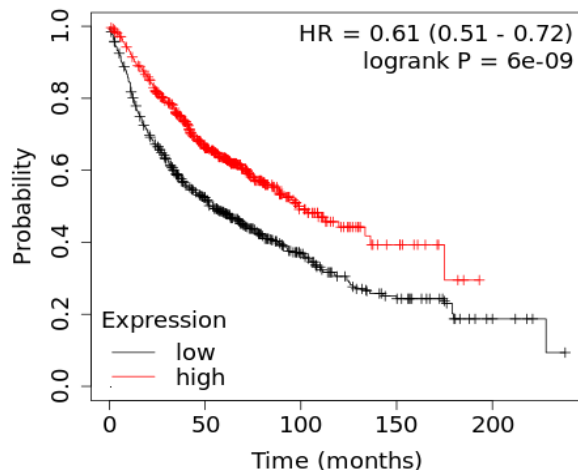

**FOXO1 (202723\_s\_at)**

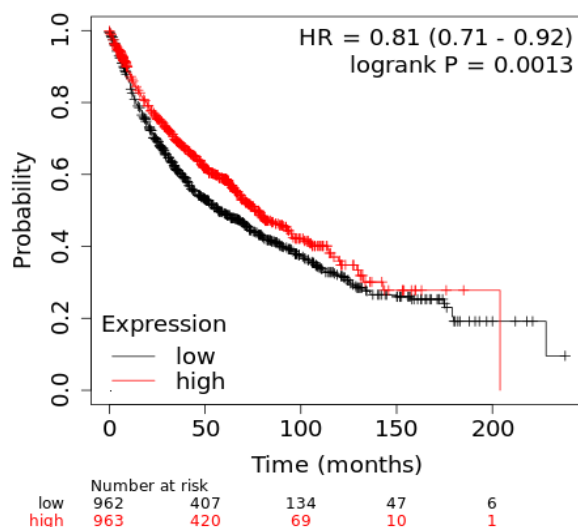

**hCPE-R (201428\_at) (CLDN-4)**

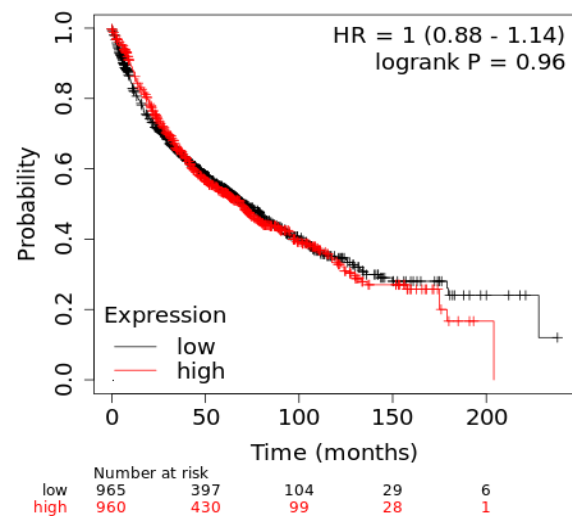

<http://kmplot.com/analysis/index.php?p=service&cancer=lung>

**Supplemental Figure S3:** TCGA shows the relation of CGN, FOXO1, and CLDN-4 expression and survival rate in lung cancer.
